# Supplementary material for: Metal oxide-embedded carbon-based materials for polymer solar cells and X-ray detectors
Source: Royal Society of Chemistry journal article supplement (doi:10.1039/d3nr05143a), 2023-11-23
Supplement: d3nr05143a1.pdf [file d3nr05143a1.pdf]

## Supporting Information

### **Metal oxide embedded carbon-based materials for polymer solar cell and X-ray detector**

Sikandar Aftab<sup>1#\*</sup>, Hailiang Liu<sup>2#</sup>, Dhanasekaran Vikraman<sup>3</sup>, Sajjad Hussain<sup>4</sup>, Jungwon Kang<sup>2\*</sup>,  
Abdullah A. Al-Kahtani<sup>5</sup>

<sup>1</sup>Department of Intelligent Mechatronics Engineering, Sejong University, Seoul 05006, South  
Korea

<sup>2</sup>Department of Electronics and Electrical Engineering, Dankook University, Yongin 16890,  
Korea

<sup>3</sup>Division of Electronics and Electrical Engineering, Dongguk University-Seoul, Seoul 04620,  
Korea

<sup>4</sup>Department of Nanotechnology and Advanced Materials Engineering, Sejong University, Seoul,  
South Korea

<sup>5</sup>Chemistry Department, Collage of Science, King Saud University, P. O. Box 2455, Riyadh,  
11451 Saudi Arabia

# These authors are contributed equally

\*Email# [aftab@sejong.ac.kr](mailto:aftab@sejong.ac.kr)

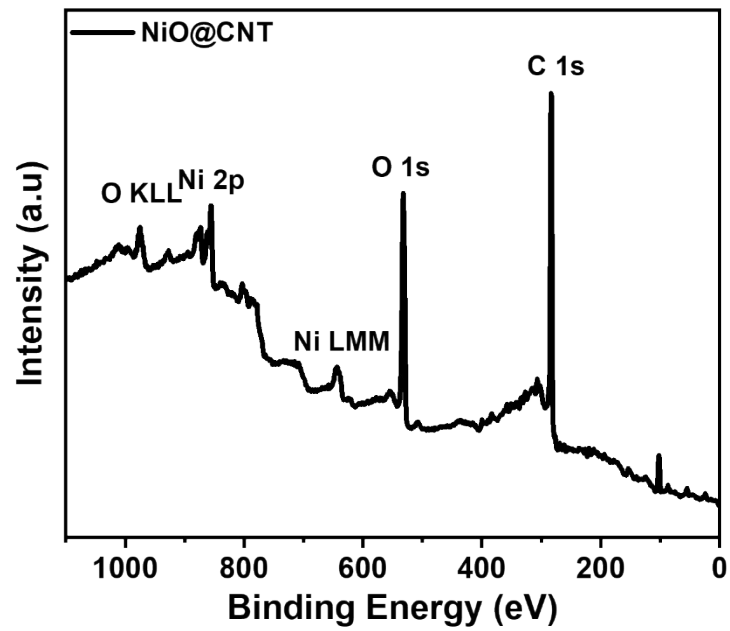

**Figure S1.** XPS survey scan of NiO@CNT hybrid nanoparticles.

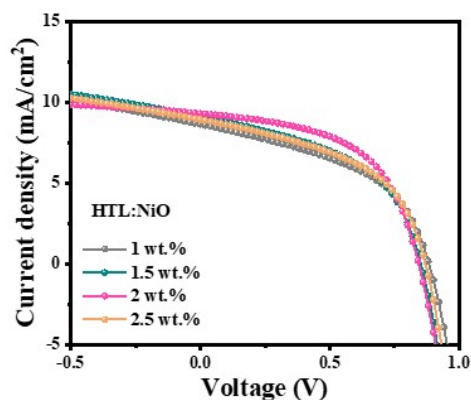

| Device    | $V_{oc}$ [V] | $J_{sc}$ [mA/cm <sup>2</sup> ] | FF [%] | PCE [%] | $R_s$ [ $\Omega \cdot \text{cm}^2$ ] |
|-----------|--------------|--------------------------------|--------|---------|--------------------------------------|
| 1 wt. %   | 0.883        | 8.67                           | 53.82  | 4.12    | 381.36                               |
| 1.5 wt. % | 0.851        | 9.15                           | 59.84  | 4.66    | 362.18                               |
| 2 wt. %   | 0.843        | 9.34                           | 61.47  | 4.84    | 357.62                               |
| 2.5 wt. % | 0.868        | 8.96                           | 56.32  | 4.38    | 371.49                               |

Revised Figure S2.  $J$ - $V$  curves of NiO (1, 1.5, 2 and 2.5 wt.%) comprised BJH solar cell.

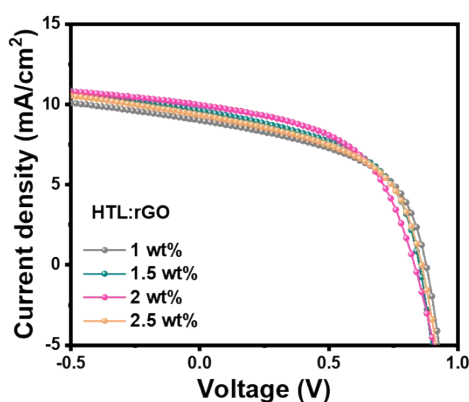

| Device  | $V_{oc}$ [V] | $J_{sc}$ [mA/cm <sup>2</sup> ] | FF [%] | PCE [%] | $R_s$ [ $\Omega \cdot \text{cm}^2$ ] |
|---------|--------------|--------------------------------|--------|---------|--------------------------------------|
| 1 wt%   | 0.877        | 8.99                           | 57.33  | 4.52    | 364.92                               |
| 1.5 wt% | 0.851        | 9.62                           | 63.15  | 5.17    | 341.56                               |
| 2 wt%   | 0.832        | 9.96                           | 65.89  | 5.46    | 328.19                               |
| 2.5 wt% | 0.859        | 9.35                           | 60.39  | 4.85    | 355.24                               |

Figure S3.  $J$ - $V$  curves of rGO (1, 1.5, 2 and 2.5 wt.%) comprised BJH solar cell.

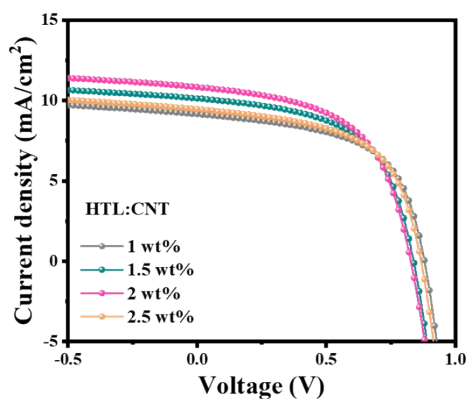

| Device  | $V_{oc}$ [V] | $J_{sc}$ [mA/cm <sup>2</sup> ] | FF [%] | PCE [%] | $R_s$ [ $\Omega \cdot \text{cm}^2$ ] |
|---------|--------------|--------------------------------|--------|---------|--------------------------------------|
| 1 wt%   | 0.881        | 9.16                           | 57.87  | 4.67    | 359.92                               |
| 1.5 wt% | 0.838        | 10.13                          | 64.55  | 5.48    | 326.74                               |
| 2 wt%   | 0.827        | 10.84                          | 65.70  | 5.89    | 309.15                               |
| 2.5 wt% | 0.867        | 9.47                           | 61.14  | 5.02    | 349.86                               |

**Figure S4.**  $J$ - $V$  curves of CNT (1, 1.5, 2 and 2.5 wt.%) comprised BJH solar cell.

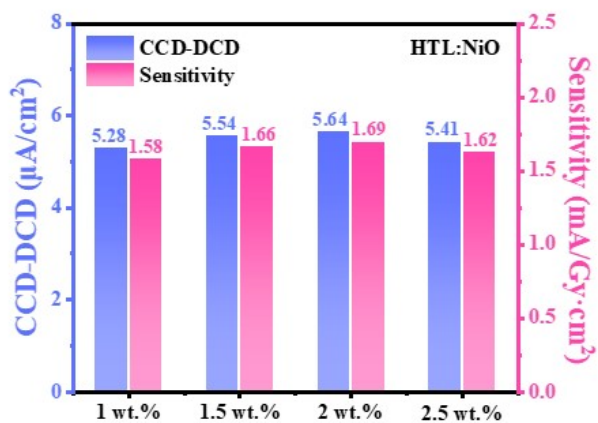

| NS 1      | CCD-DCD [ $\mu\text{A}/\text{cm}^2$ ] | Sensitivity [ $\text{mA}/\text{Gy}\cdot\text{cm}^2$ ] |
|-----------|---------------------------------------|-------------------------------------------------------|
| 1 wt. %   | 5.28                                  | 1.58                                                  |
| 1.5 wt. % | 5.54                                  | 1.66                                                  |
| 2 wt. %   | 5.64                                  | 1.69                                                  |
| 2.5 wt. % | 5.41                                  | 1.62                                                  |

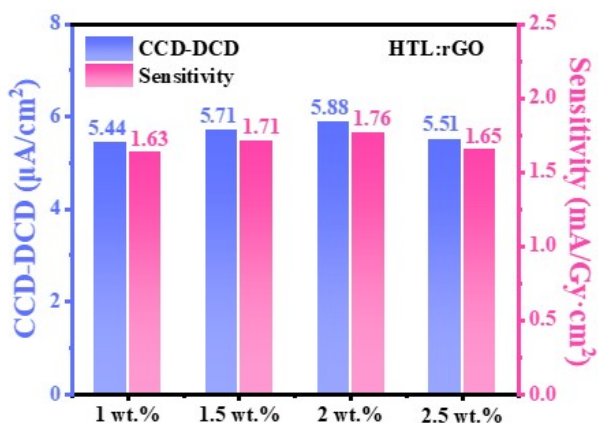

| NS 1      | CCD-DCD [ $\mu\text{A}/\text{cm}^2$ ] | Sensitivity [ $\text{mA}/\text{Gy}\cdot\text{cm}^2$ ] |
|-----------|---------------------------------------|-------------------------------------------------------|
| 1 wt. %   | 5.44                                  | 1.63                                                  |
| 1.5 wt. % | 5.71                                  | 1.71                                                  |
| 2 wt. %   | 5.88                                  | 1.76                                                  |
| 2.5 wt. % | 5.51                                  | 1.65                                                  |

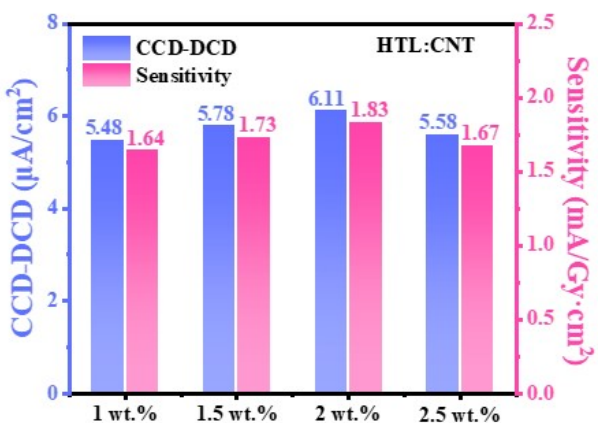

| NS 1      | CCD-DCD [ $\mu\text{A}/\text{cm}^2$ ] | Sensitivity [ $\text{mA}/\text{Gy}\cdot\text{cm}^2$ ] |
|-----------|---------------------------------------|-------------------------------------------------------|
| 1 wt. %   | 5.48                                  | 1.64                                                  |
| 1.5 wt. % | 5.78                                  | 1.73                                                  |
| 2 wt. %   | 6.11                                  | 1.83                                                  |
| 2.5 wt. % | 5.58                                  | 1.67                                                  |

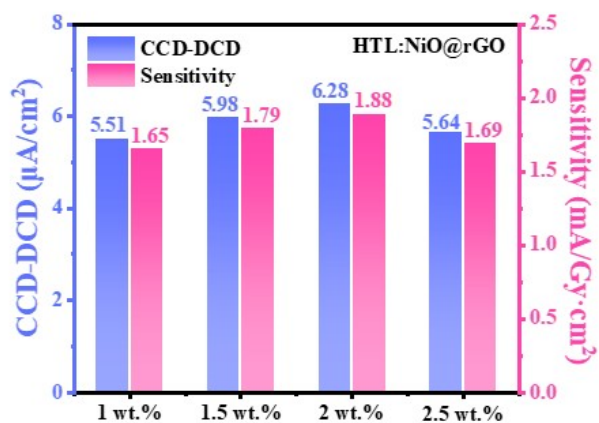

| NS 1     | CCD-DCD [ $\mu\text{A}/\text{cm}^2$ ] | Sensitivity [ $\text{mA}/\text{Gy}\cdot\text{cm}^2$ ] |
|----------|---------------------------------------|-------------------------------------------------------|
| 1 wt.%   | 5.51                                  | 1.65                                                  |
| 1.5 wt.% | 5.98                                  | 1.79                                                  |
| 2 wt.%   | 6.28                                  | 1.88                                                  |
| 2.5 wt.% | 5.64                                  | 1.69                                                  |

**Figure S5.** CCD-DCD and sensitivity at NiO, rGO, CNT, and NiO<sub>2</sub>@rGO with (1, 1.5, 2 and 2.5 wt.%) of X-ray detector.
